# Supplementary material
Source: PubMed Central journal article supplement (PMC6711763)
Supplement: EMS80579-supplement-All_supplementary_data.pdf [file EMS80579-supplement-All_supplementary_data.pdf]

**Supplementary Information**

***Knopfova L et al.***

**Transcription factor c-Myb inhibits breast cancer lung metastasis  
by suppression of tumor cell seeding**

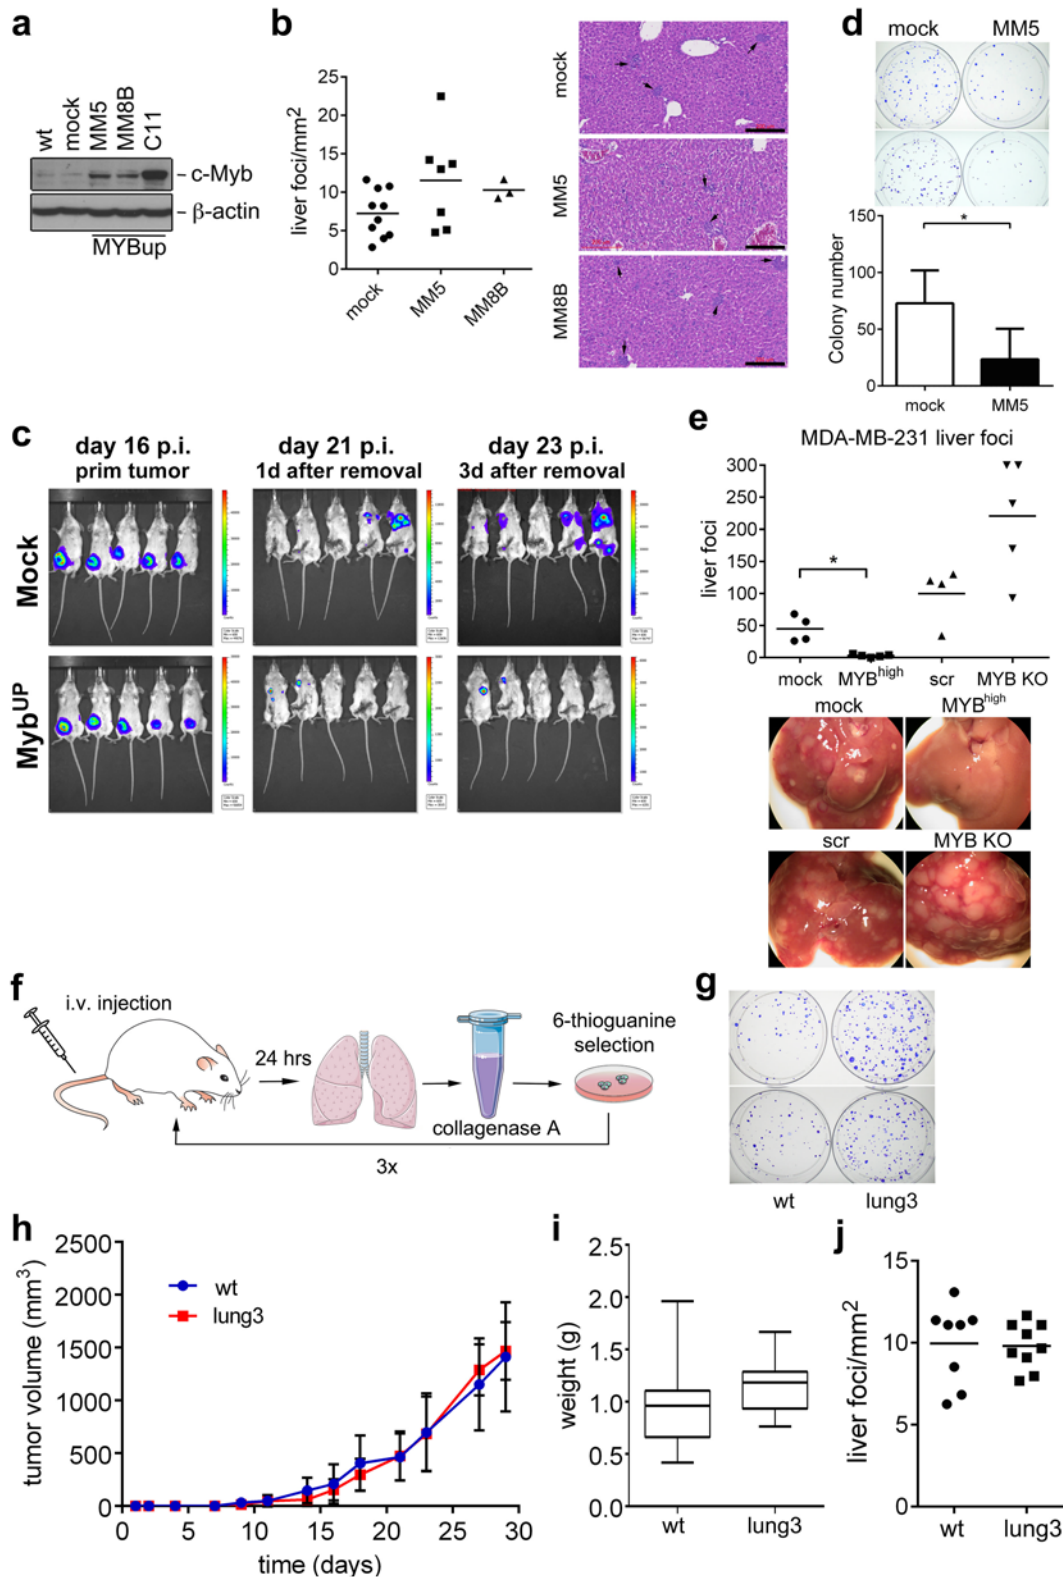

**Figure S1. c-Myb expression inhibits lung metastasis and has no effect on liver metastasis.** (a) Immunoblot analysis of c-Myb expression in 4T1 cells: wt- wild type, mock, *Myb*-overexpressing MM5, MM8B, and C11. (b) Quantification of liver foci (left panel) and representative H&E staining of liver sections 28 days after m.f.p. injection of 4T1 cells (mock and MYB<sup>high</sup> MM5, MM8B) (2 independent experiments). Scale bar =200 $\mu$ m (right panel). (c) *Myb*-overexpressing (MYB<sup>UP</sup>) and mock-transfected 4T1-12B cells (expressing luciferase) were injected into m.f.p. Tumor formation and metastasis was monitored by bioluminescence imaging. 20 days p.i. tumors were removed, animals were then imaged at day 1 and 3 post

tumor removal. **(d)** Lung seeding of 4T1 cells, mock and MYB<sup>high</sup> clone MM5, 24 hours after i.v. injection represented as number of 6-thioguanine-resistant colonies from digested lungs (n=3); representative images of cell colonies and quantification after 10 days. **(e)** Metastasis of MDA-MB-231 cells upon mammary fat pad injection into NSG mice and terminated at day 42, using MDA-MB-231 cells: transfected with empty vector (mock), overexpressing *MYB* (MYB<sup>high</sup>), transfected with control gRNA (Scr); and deficient in *MYB* expression (MYB KO). Quantification of liver metastasis with representative tissue images. **(f)** Scheme showing the selection of lung3 cells from parental 4T1 wt cell line. **(g)** Lung seeding of 4T1 cells, wt and lung3 subline, representative images of 6-thioguanine-resistant colonies from digested lungs cell colonies after 10 days. **(h)** Tumor growth was monitored for 28 days p.i. of 4T1 wt and lung3 cells by measuring tumor length (l)/width (w) by caliper, tumor volume was calculated using a formula  $\pi * l * w^2 / 2$ . **(i)** Tumor weight was measured at termination. Data are median, 75<sup>th</sup>/25<sup>th</sup> percentile  $\pm$  min/max. **(j)** Number of liver metastatic foci in wt and lung3-injected mice (2 independent experiments).

**a**

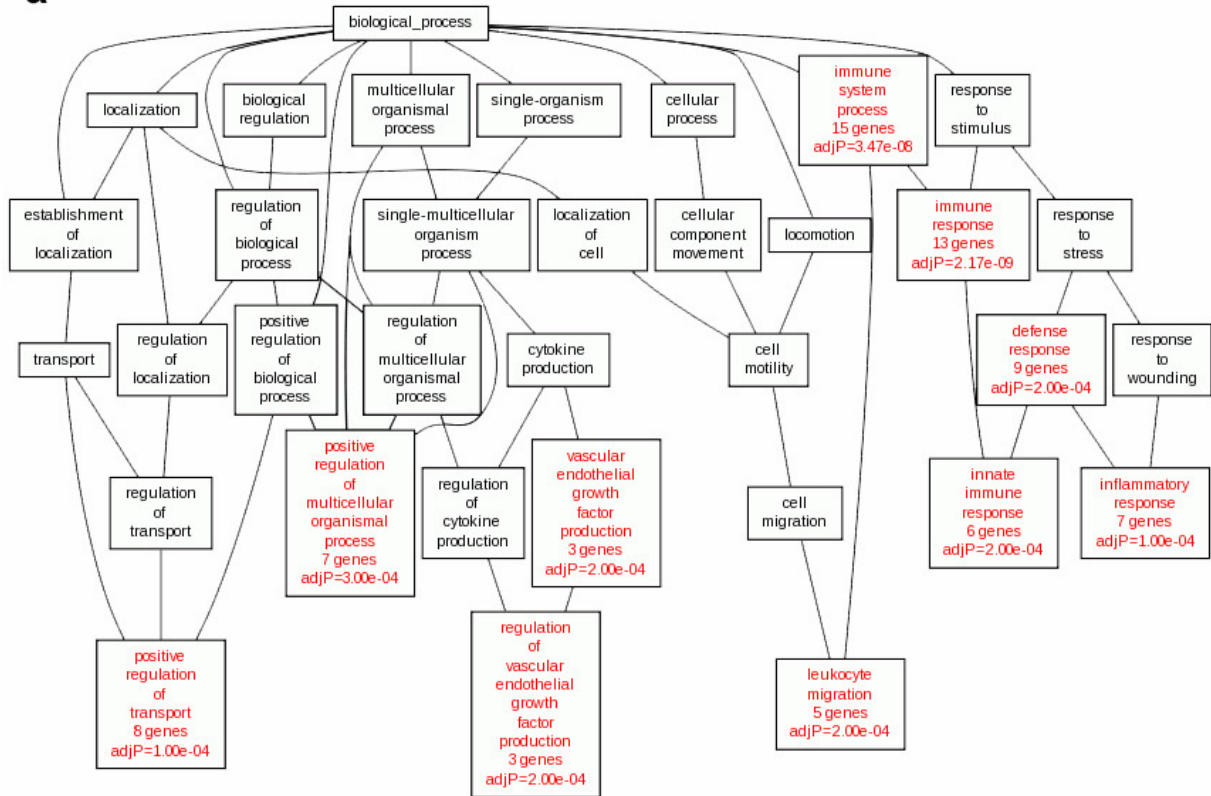

**b**

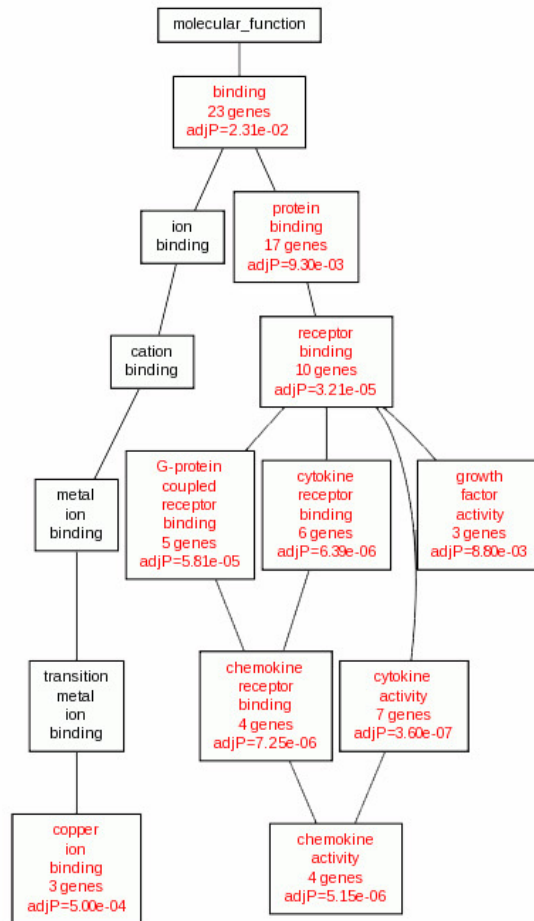

**c**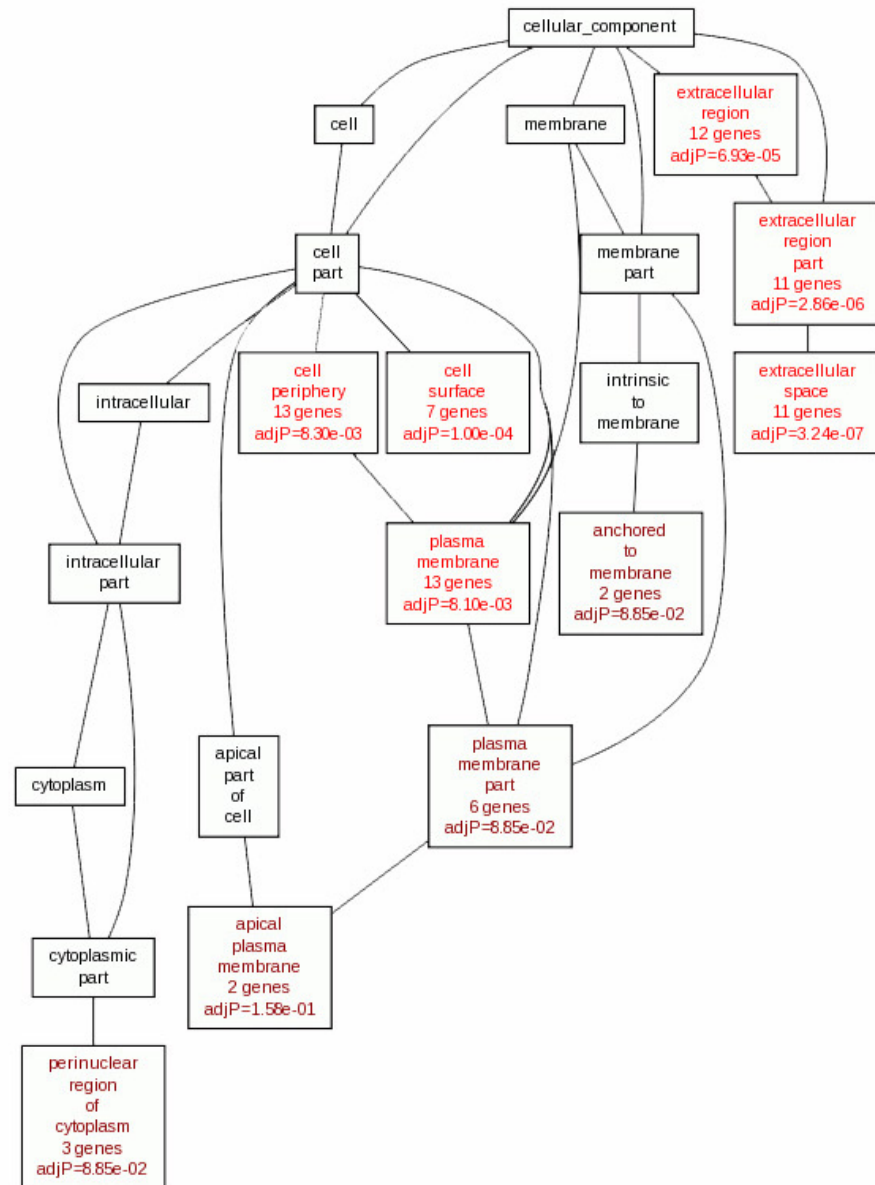

**Figure S2. Graph-based visualization of GO enrichment analysis for 35 genes highly expressed in lung3 and suppressed in MYB<sup>high</sup> cells.** GO enrichment analysis was performed using WebGestalt (WEB-based GENE SeT AnaLysis Toolkit). Significantly enriched GO categories under Biological Process (a), Molecular Function (b), and Cellular Component (c) are shown with three separate Directed Acyclic Graphs (DAGs). Each GO category is a node in the DAG. The enriched GO categories in the top 10 that have a p value < 0.05 are colored red. GO categories in the top 10 that have a p value > 0.05 are colored brown, and the black ones are the parents of the top 10 categories.

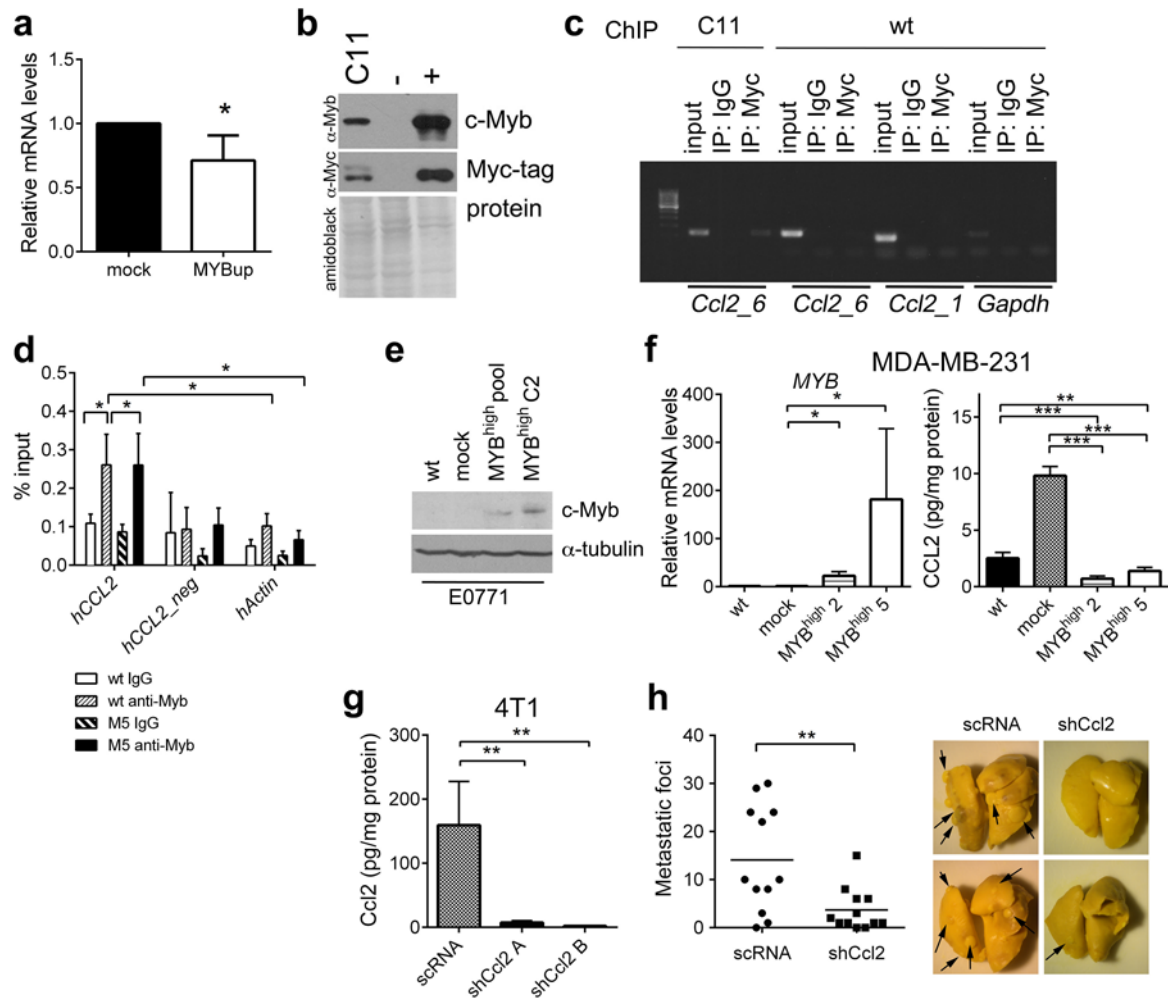

**Figure S3. c-Myb directly modulates Ccl2 expression and Ccl2 knock-down mimics the inhibitory effect of Myb-overexpression on lung metastasis.** (a) Ccl2 is down-regulated in 4T1 cells upon transient overexpression of Myb. mRNA levels were determined by qPCR 48 hours after transfection with expression plasmid harboring Myb cDNA (MYBup). Values were normalized to Gapdh and displayed as relative to mock-transfected cells (n=5). (b) Myc-tagged Myb expression in stable clone of 4T1 cells (C11) by immunoblot, + positive control, - negative control (right panel). (c) PCR was performed with immunoprecipitated chromatin fragments from C11 and wt cells. Two regions in the Ccl2 promoter harboring the MBSs (Ccl2\_1, 100 bp; Ccl2\_6, 142 bp) were PCR amplified. Amplification of Gapdh\_TSS (124 bp) was used as a specific control. Non-immunoprecipitated chromatin was used as input. (d) ChIP assays were performed with anti-Myb antibody or non-specific rabbit IgG in MDA-MB-231 cells transfected with human MYB (M5) and wt cells (n=3). Primers spanning two different MBSs (hCCL2) and region without MBSs (hCCL2\_neg) were used for qPCR amplification and data are shown as percentage of input, unpaired t-test. hActin was used as a negative control. (e) Immunoblot analysis of c-Myb expression in E0771.LMB cells stably transfected with Myb (MYB<sup>high</sup>). (f) MYB-overexpression in MDA-MB-231 breast cancer cells. mRNA levels (left panel) were determined by qPCR in two independent clones. Values were normalized to GAPDH and displayed as relative to wt cells. CCL2 levels (right panel) in the medium of respective MYB-overexpressing MDA-MB-231 clones (n=3). (g) Ccl2 protein levels in the conditioned media of 2 independent clones of 4T1 cells transduced with pLKO.1-puro harboring 2 different Ccl2 specific shRNA (shCcl2 A and B) and non-targeting shRNA control (scRNA) were normalized to total protein content (n = 3, unpaired t-test). (h) Number of metastatic foci in lungs of tumor bearing mice 28 days after m.f.p. injection of

4T1 scRNA and shCcl2 B cells (2 independent experiments). Representative images of lungs fixed in Bouin's solution. \*;  $p < 0.05$ ; \*\*;  $p < 0.01$ ; \*\*\*;  $p < 0.001$ .

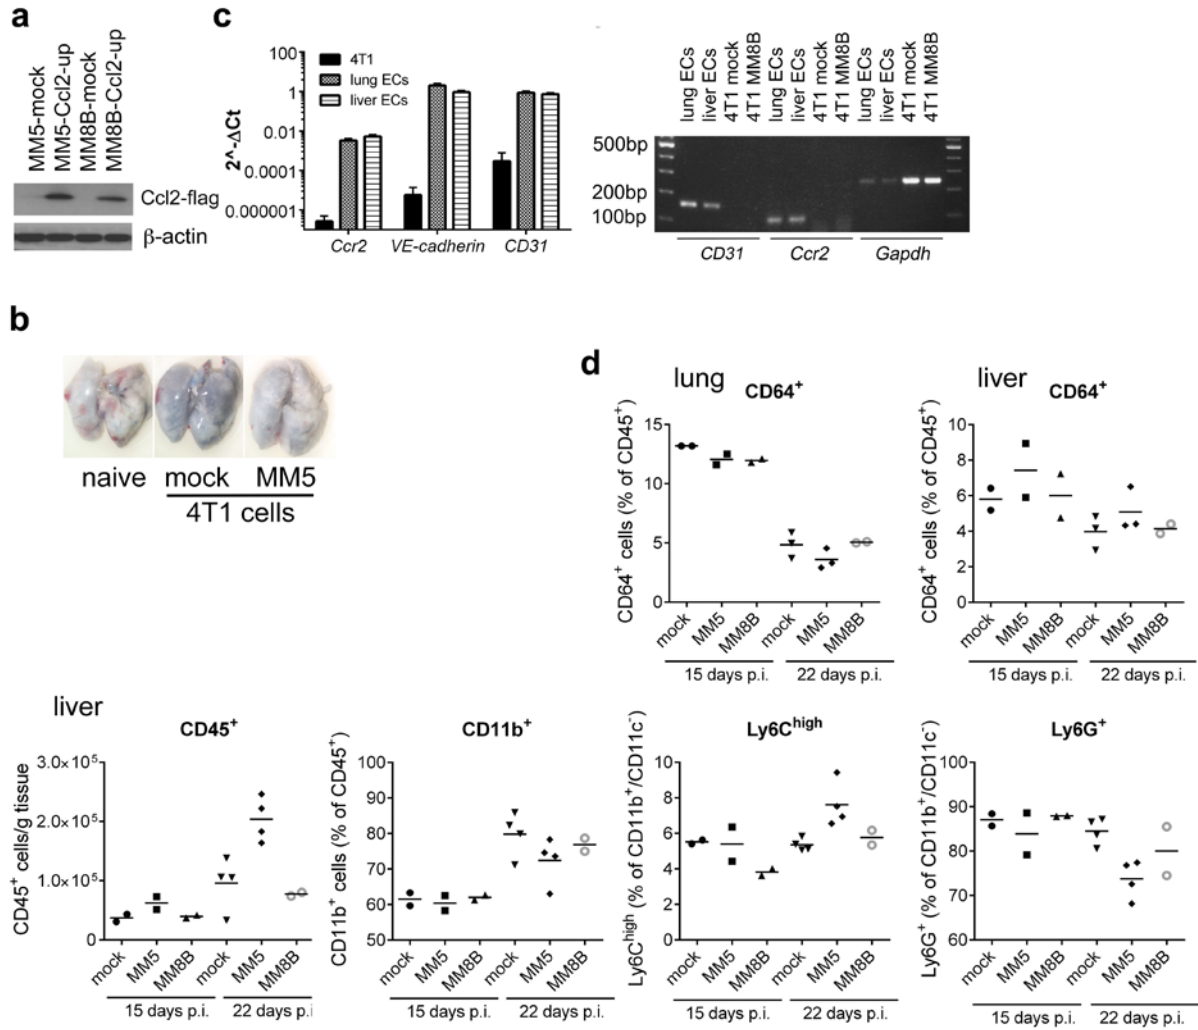

**Figure S4. Endothelial *Ccr2* mediated tissue specific effect.** (a) Immunoblot detection of exogenous Ccl2 protein using Ab specific for flag epitope 24 hours after transient transfection of *Myb*-overexpressing cells (MM5 and MM8B), left. (b) Macroscopic images of lungs from mice: untreated (naïve) or 24 hours p.i. with 4T1 mock and MM5 cells, treated with Evans blue. (c) Expression levels of *Ccr2*, *VE-cadherin*, and *CD31* mRNA 4T1 tumor cells and in primary ECs isolated from mouse lung and liver tissues using a positive immuno-magnetic selection (anti-CD31) were analyzed by qPCR, normalized to *Gapdh* and displayed as  $2^{-\Delta Ct}$  (n=2) (left panel). *CD31*, *Ccr2*, and *Gapdh* mRNA in endothelial and tumor cells (4T1 mock and MM8B) as detected by RT-PCR (right panel). (d) Flow cytometry analysis of macrophage-like cells (CD45<sup>+</sup>CD64<sup>+</sup>), total leukocytes (CD45<sup>+</sup>), myeloid cells (CD45<sup>+</sup>CD11b<sup>+</sup>), granulocytes (CD45<sup>+</sup>CD11b<sup>+</sup>CD11c<sup>-</sup>Ly6G<sup>+</sup>), and inflammatory monocytes (CD45<sup>+</sup>CD11b<sup>+</sup>CD11c<sup>-</sup>Ly6G<sup>+</sup>Ly6C<sup>hi</sup>) recruited to lungs and liver of mice m.f.p.-injected with 4T1 mock or MYB<sup>high</sup> (MM5 and MM8B) cells 15 and 22 days post injection (p.i.).



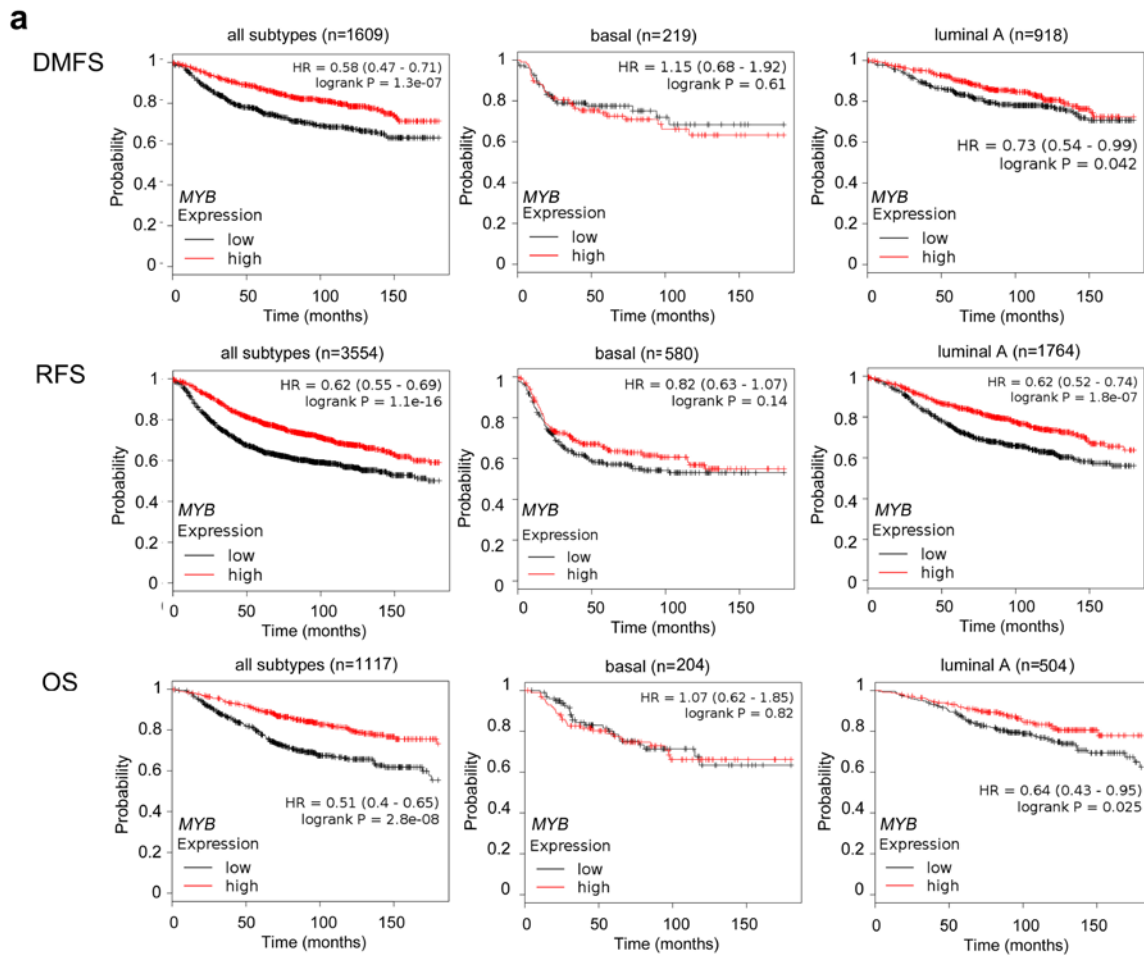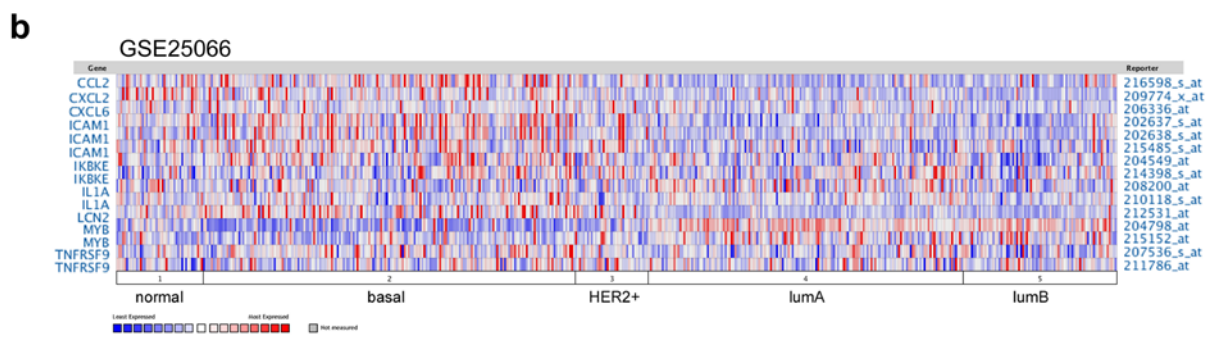

**Figure S5. Survival analysis.** (a) Meta-analyses of BCs patients available on KMplot.com representing the probability of distant metastasis free survival (DMFS), relapse-free survival (RFS) and overall survival (OS) in BCs stratified according to *MYB* expression. The log-rank test *P* value reflects the significance of the correlation between *MYB* high and longer survival outcome. Patients split by median, follow up threshold 15 years. KM plotter 2014 version (n=4142). (b) Heat map showing expression levels of *MYB* and identified signature genes in human BCs (GSE25066). Red and blue indicate high and low mRNA expression levels, respectively.

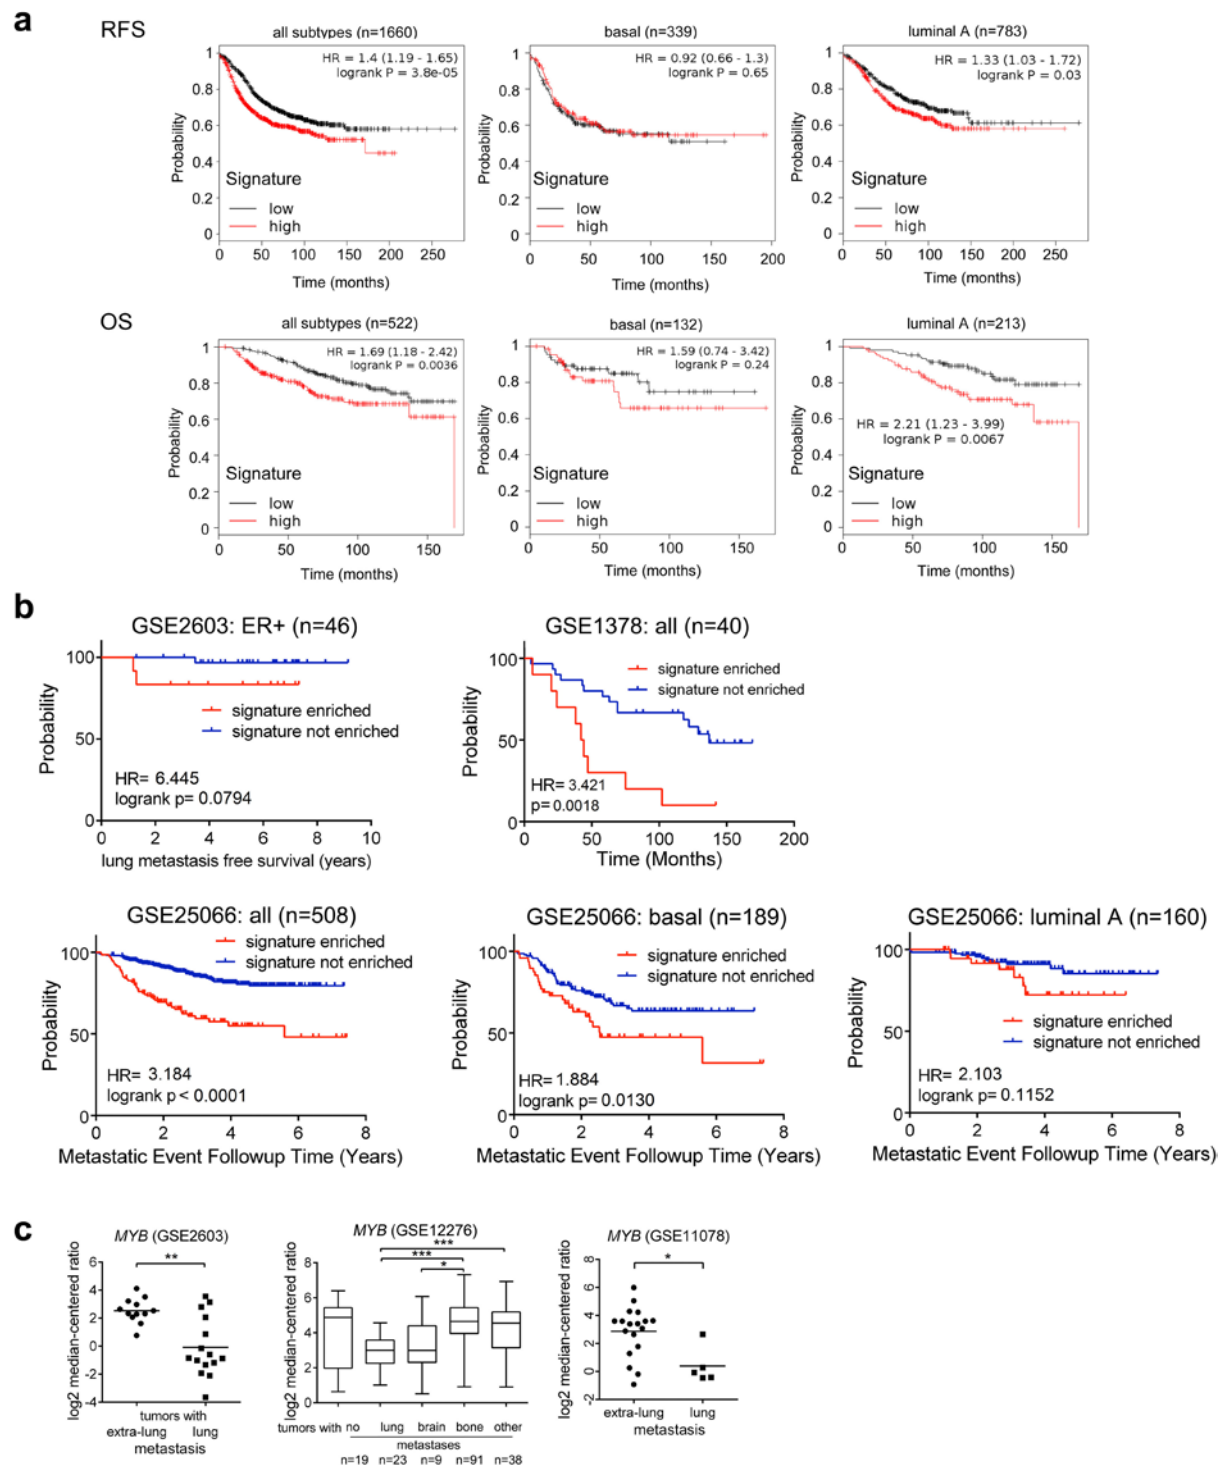

**Figure S6. Kaplan-Meier survival plots.** (a) Kaplan-Meier plots from meta-analyses (kmplot.com) (1) representing the probability of distant metastasis free survival (DMFS), relapse-free survival (RFS) and overall survival (OS) in BCs stratified according to the expression status of the signature genes (*CCL2*, *CXCL1*, *CXCL2*, *CXCL6*, *CXCL16*, *ICAM1*, *IL1A*, *TNFRSF9*, *LCN2*, *IKBKE*) and *MYB* (inversed). The log-rank test *P* value reflects the significance of the correlation between gene set high and shorter survival outcome. (b) Kaplan-Meier plots showing metastasis-free survival in additional cohorts of BC patients (GSE2603 ER+ only, GSE1378, GSE25066) based on signature enrichment as determined by z-score. Log-rank test analysis. (c) Expression of *MYB* mRNA as determined by microarray in BCs with site-specific metastases (GSE2603; GSE12276, patients with single metastases) and in metastatic deposits of BCs in lung and other organs (GSE11078).

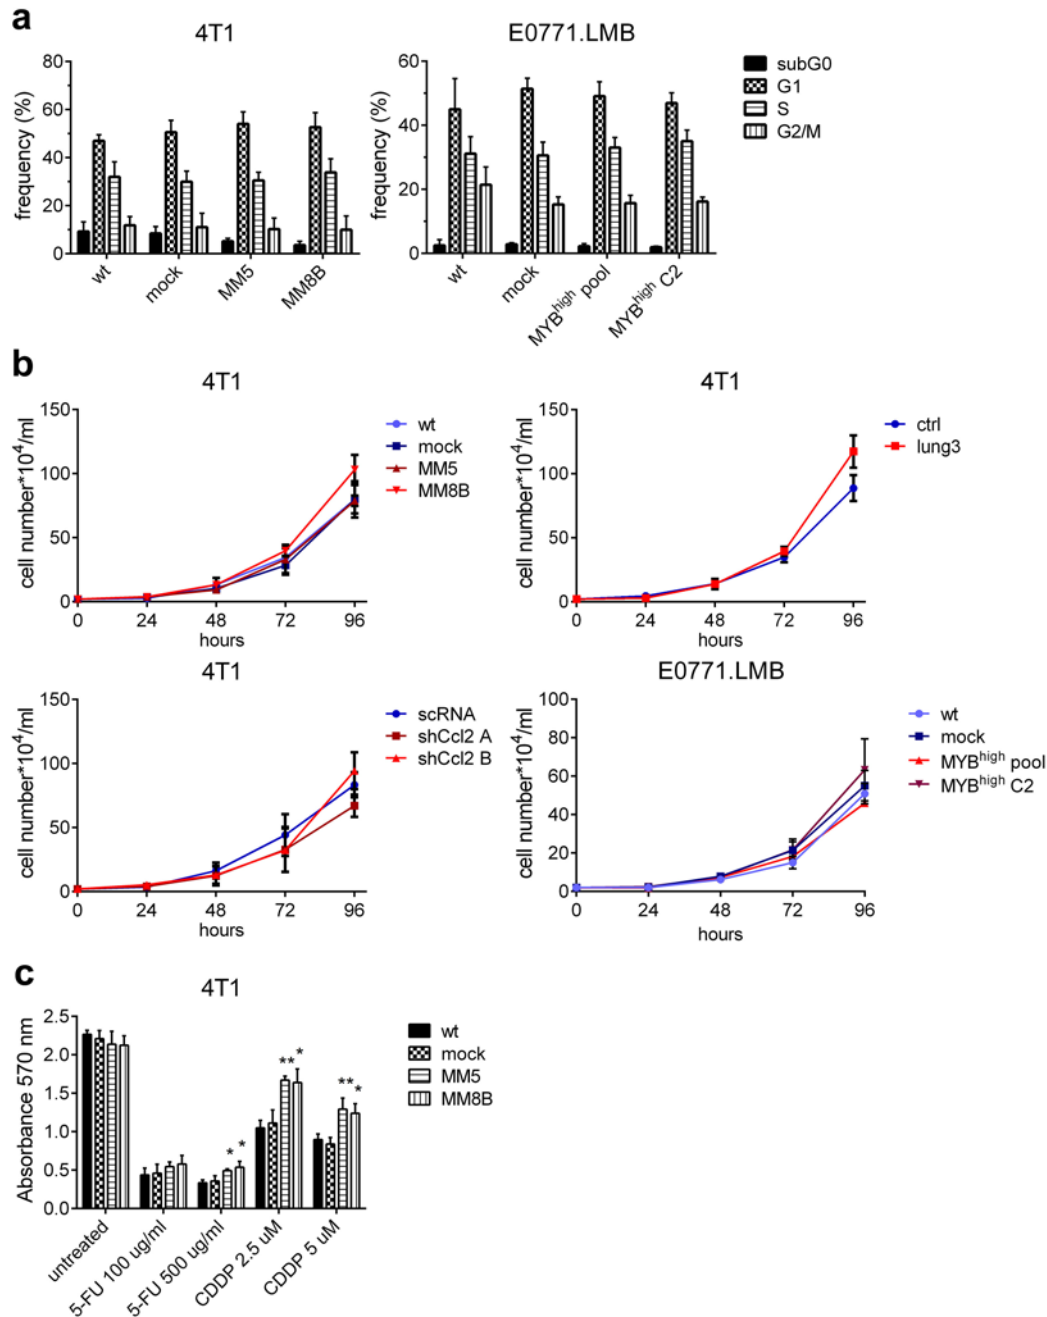

**Figure S7. Characterization of *Myb*-overexpressing murine cell lines 4T1 and E0771.LMB.** **a**) Cell cycle distribution in 4T1 and E0771.LMB MYB<sup>high</sup> cells (n=3). **b**) Proliferation of 4T1 and E0771.LMB MYB<sup>high</sup> cells, lung3 and Ccl2 knock-down sublines of 4T1 cells *in vitro*. Number of viable cells as determined by CASY cell counter (Roche) at the indicated time points (n=3). **c**) Chemosensitivity of 4T1 MYB<sup>high</sup> cells. 4T1 cells (wt, mock, MYB<sup>high</sup> MM5 and MM8B) were treated with 5-fluorouracil (5-FU) and cisplatin (CDDP) at the indicated concentrations for 48 hours and viable cells were quantified using crystal violet staining (n=3).

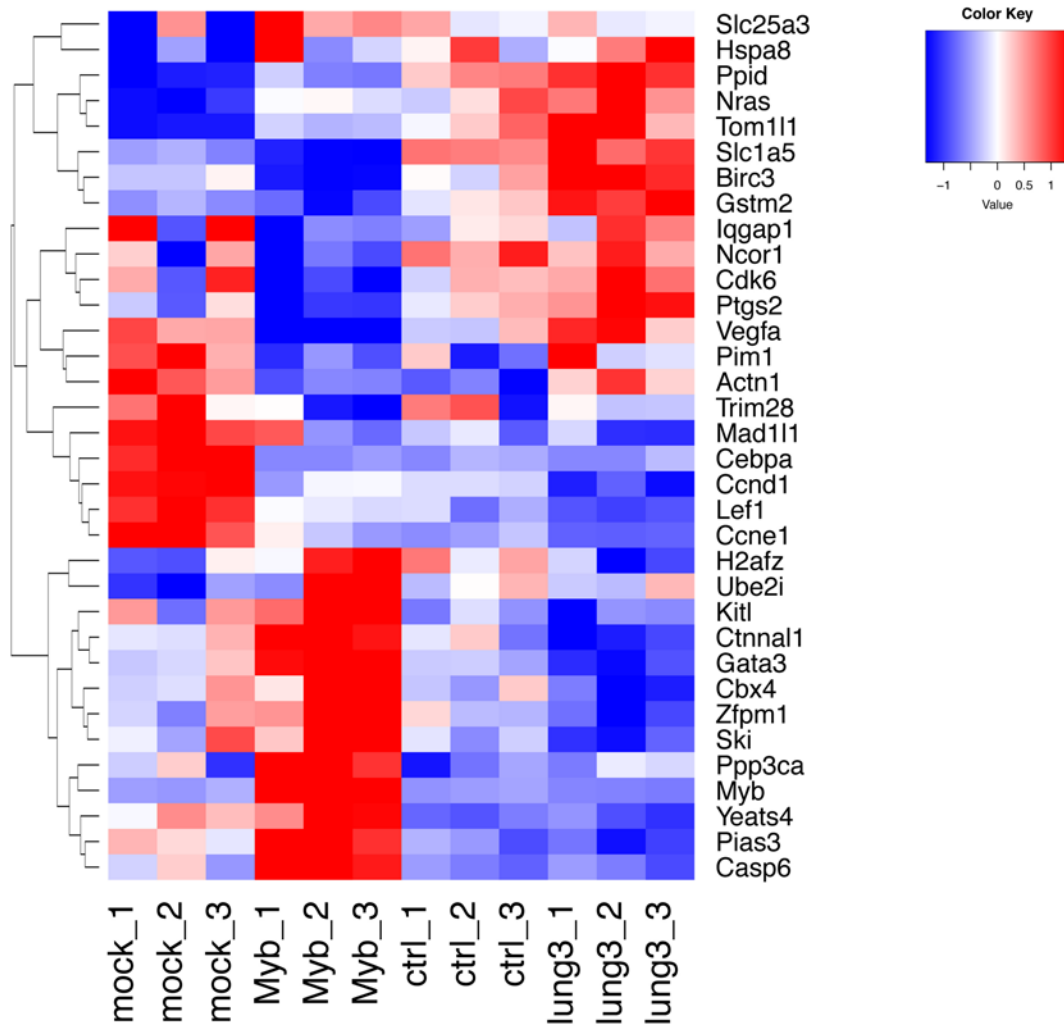

**Figure S8. Testing Myb signature genes in 4T1MYB<sup>high</sup>/lung3 cells.** Heat map of Myb responsive genes (<http://www.ncbi.nlm.nih.gov/biosystems/138073>, and (2) differentially expressed ( $p < 0.05$ ) in 4T1MM5 cells compared to mock-transfected cells as determined by RNAseq.

**Table S1: Primers used for qPCR:**

| <b>Primer sequences</b> |                                                                               |
|-------------------------|-------------------------------------------------------------------------------|
| Ccl2                    | Forward: 5' TTAACGCCCCACTCACCTGC 3'<br>Reverse: 5' TTGGGTCAGCACAGACCTCTC 3'   |
| Cxcl1                   | Forward: 5' ACCGAAGTCATAGCCACACTC 3'<br>Reverse: 5' CTCCGTTACTTGGGGACACC 3'   |
| Cxcl5                   | Forward: 5' CTGCGTTGTGTTTGCTTAAC 3'<br>Reverse: 5' GACAGACCTCCTTCTGGTTT 3'    |
| Cxcl16                  | Forward: 5' AACTCTGCAGGTTTGCAGCTC 3'<br>Reverse: 5' GGGTCAGCAGGTCAAAGCTA 3'   |
| Gapdh                   | Forward: 5' TCATGACCACAGTCCATGCC 3'<br>Reverse: 5' ACTTGGCAGGTTTCTCCAGG 3'    |
| Icam1                   | Forward: 5' CCCCAGGTCCTCAATTACACA 3'<br>Reverse: 5' CCAAGCAGTCCGTCTCGTCC 3'   |
| Ikbke                   | Forward: 5' GGCCCGAAACAAGAAATCCG 3'<br>Reverse: 5' GCAGGACCTCAAACCTCCCTC 3'   |
| Il1a                    | Forward: 5' GCTTGAGTCGGCAAAGAAATCAA 3'<br>Reverse: 5' ACGTTGCTGATACTGTACCC 3' |
| Lcn2                    | Forward: 5' CCAGGCCAGGACTCAACTC 3'<br>Reverse: 5' CCTGCCCGGAAGTATCG 3'        |
| Myb                     | Forward: 5' CATTGATGGGGTTTGGGCA 3'<br>Reverse: 5' AGGATAGGGAACGTGACTGGA 3'    |
| Tnfrsf9                 | Forward: 5' GCTGCCCTGAGATCGAAA 3'<br>Reverse: 5' GAAAGTACCAGGCTGACAGTTA 3'    |

Primers used for ChIP:

| <b>Primer sequences</b> |                                                                                 |
|-------------------------|---------------------------------------------------------------------------------|
| Ccl2_1                  | Forward: 5' CACTTCCTGGAACACCCGA 3'<br>Reverse: 5' TGCTTGGTGCCAAGGAGTAG 3'       |
| Ccl2_4                  | Forward: 5' AGCCAGACATTCCAGTTGGC 3'<br>Reverse: 5' AGAAGCCTGTGTGTTAGCGT 3'      |
| Ccl2_6                  | Forward: 5' AAACAGGGCAGAGAGCTACC 3'<br>Reverse: 5' TCCAGCCTGGCTATCATCAC 3'      |
| Gapdh_TSS               | Forward: 5' TGAGCCTCCTCCAATTCAACC 3'<br>Reverse: 5' CTGCAGCCTGGAAACCTGATA 3'    |
| Gata3_TSS               | Forward: 5' CCGAGGACATGGAGGTGACT 3'<br>Reverse: 5' TCCATGTACGAATGGCCGAG 3'      |
| hCCL2                   | Forward: 5' TTCCAGCAGTATGTCAGAGAGG 3'<br>Reverse: 5' TGTAGTGCTGCAGAAGAAATGC 3'  |
| hCCL2_neg               | Forward: 5' CCCGGGGTAACTGAGGATTC 3'<br>Reverse: 5' TAGGCTCTGGCACAAACCTG 3'      |
| hActin                  | Forward: 5' AGTGTGGTCTGCGACTTCTAAG 3'<br>Reverse: 5' CCTGGGCTTGAGAGGTAGAGTGT 3' |

Primer used for plasmid construction:

---

| <b>Primer sequences</b> |                                                                                                                       |
|-------------------------|-----------------------------------------------------------------------------------------------------------------------|
| mCcl2                   | Forward: 5' GAGCGAATTCCACCATGCAGGTCCCTGTCATGC 3'<br>Reverse: 5' GAGCTCTAGAGTTCACTGTCACACTGGTCACTC 3'                  |
| Myb-stop                | Forward: 5' GAGCAAGCTTGCCATGGCCCGGAGAC 3'<br>Reverse: 5' GAGCGGATCCCATGACCAGAGTTCGAGCTGAGA 3'                         |
| Myc-tag                 | Forward: 5' GATCCGAACAAAACTCATCTCAGAAGAGGATCTGTGATAGC 3'<br>Reverse: 5' TCGAGCTATCACAGATCCTCTTCTGAGATGAGTTTTTGTTCG 3' |

---

Oligont used for gRNA construction:

---

| <b>Primer sequences</b> |                                                                                      |
|-------------------------|--------------------------------------------------------------------------------------|
| Myb                     | Forward: 5' CACCGAAGTCTGGAAAGCGTCACTT 3'<br>Reverse: 5' AAACAAGTGACGCTTCCAGACTTC 3'  |
| GFP                     | Forward: 5' CACCGAACAGTCGCGTTTGCGACTG 3'<br>Reverse: 5' AAACCAGTCGCAAACGCGACTGTTC 3' |
| seq                     | Forward: 5' GGTTCAGACATGCAGGGGAA 3'<br>Reverse: 5' AGGATGAGAACTCAACAGGCA 3'          |

---

**Table S2: Total number of mapped reads per sample in RNA-seq.**

| RNA-seq Samples | Mapped Read Count Total |
|-----------------|-------------------------|
| mock_1          | 25990118                |
| mock_2          | 17385612                |
| mock_3          | 18404018                |
| Myb_1           | 15177941                |
| Myb_2           | 16367893                |
| Myb_3           | 22738254                |
| ctrl_1          | 27277311                |
| ctrl_2          | 30560072                |
| ctrl_3          | 25331221                |
| lung3_1         | 17051044                |
| lung3_2         | 10959734                |
| lung3_3         | 18106160                |

**Table S3**  
Curtis Breast (EGAS00000000083)

| MYB /<br>ILMN_1711894     | all subtypes (n=1985) |                |      | basal (n=331)  |                |      | luminal A (n=720) |                |      | luminal B (n=492) |                |      | HER2+ (n=240)  |                |      | normal (n=202) |                |      |
|---------------------------|-----------------------|----------------|------|----------------|----------------|------|-------------------|----------------|------|-------------------|----------------|------|----------------|----------------|------|----------------|----------------|------|
|                           | r                     | p (two-tailed) |      | r              | p (two-tailed) |      | r                 | p (two-tailed) |      | r                 | p (two-tailed) |      | r              | p (two-tailed) |      | r              | p (two-tailed) |      |
| CCL2 /<br>ILMN_1720048    | <b>-0.4331</b>        | <<br>0.0001    | **** | <b>-0.23</b>   | <<br>0.0001    | **** | <b>-0.3094</b>    | <<br>0.0001    | **** | <b>-0.2586</b>    | <<br>0.0001    | **** | <b>-0.4767</b> | <<br>0.0001    | **** | <b>-0.3921</b> | <<br>0.0001    | **** |
| CXCL1 /<br>ILMN_1787897   | <b>-0.2709</b>        | <<br>0.0001    | **** | -0.01935       | 0.7258         | ns   | -0.08715          | 0.0193         | *    | -0.05378          | 0.2337         | ns   | <b>-0.1829</b> | 0.0045         | **   | -0.101         | 0.1525         | ns   |
| CXCL2 /<br>ILMN_1682636   | <b>-0.2673</b>        | <<br>0.0001    | **** | -0.03169       | 0.5656         | ns   | <b>-0.1076</b>    | 0.0038         | **   | -0.06945          | 0.1239         | ns   | <b>-0.3614</b> | <<br>0.0001    | **** | <b>-0.2192</b> | 0.0017         | **   |
| CXCL6 /<br>ILMN_1779234   | <b>-0.2045</b>        | <<br>0.0001    | **** | 0.1158         | 0.0352         | *    | -0.07693          | 0.039          | *    | <b>-0.1171</b>    | 0.0093         | **   | <b>-0.1438</b> | 0.0259         | *    | <b>-0.1694</b> | 0.0159         | *    |
| CXCL16 /<br>ILMN_1672278  | -0.06619              | 0.0032         | **   | -0.00468       | 0.9324         | ns   | <b>-0.1348</b>    | 0.0003         | ***  | -0.04254          | 0.3464         | ns   | -0.1157        | 0.0737         | ns   | 0.05108        | 0.4704         | ns   |
| IL1A /<br>ILMN_1658483    | <b>-0.1529</b>        | <<br>0.0001    | **** | -0.05844       | 0.2891         | ns   | <b>-0.1274</b>    | 0.0006         | ***  | <b>-0.1333</b>    | 0.0031         | **   | <b>-0.1731</b> | 0.0072         | **   | -0.09537       | 0.177          | ns   |
| ICAM1 /<br>ILMN_1812226   | -0.09391              | <<br>0.0001    | **** | <b>-0.1266</b> | 0.0212         | *    | -0.05921          | 0.1124         | ns   | -0.03724          | 0.4098         | ns   | -0.07003       | 0.2799         | ns   | -0.1192        | 0.0912         | ns   |
| TNFRSF9 /<br>ILMN_1813379 | <b>-0.3785</b>        | <<br>0.0001    | **** | <b>-0.1914</b> | 0.0005         | ***  | <b>-0.2333</b>    | <<br>0.0001    | **** | <b>-0.1454</b>    | 0.0012         | **   | <b>-0.2017</b> | 0.0017         | **   | <b>-0.2702</b> | 0.0001         | ***  |
| LCN2 /<br>ILMN_1692223    | <b>-0.3561</b>        | <<br>0.0001    | **** | 0.06508        | 0.2377         | ns   | <b>-0.1075</b>    | 0.0039         | **   | -0.05049          | 0.2637         | ns   | <b>-0.2426</b> | 0.0002         | ***  | -0.1038        | 0.1414         | ns   |
| IKBKE /<br>ILMN_1755024   | <b>-0.1733</b>        | <<br>0.0001    | **** | -0.03553       | 0.5194         | ns   | 0.059             | 0.1137         | ns   | 0.05253           | 0.2458         | ns   | 0.1883         | 0.0034         | **   | -0.08953       | 0.2051         | ns   |



**Table S3 cont.**  
Hatzis Breast (GSE25066)

| MYB /<br>204798_at       | all subtypes (n=508) |                |      | basal (n=189)  |                |      | luminal A (n=160) |                |      | luminal B (n=78) |                |      | HER2+ (n=37)   |                |    | normal (n=44)  |                |     |
|--------------------------|----------------------|----------------|------|----------------|----------------|------|-------------------|----------------|------|------------------|----------------|------|----------------|----------------|----|----------------|----------------|-----|
|                          | r                    | p (two-tailed) |      | r              | p (two-tailed) |      | r                 | p (two-tailed) |      | r                | p (two-tailed) |      | r              | p (two-tailed) |    | r              | p (two-tailed) |     |
| CCL2 /<br>216598_s_at    | <b>-0.3114</b>       | < 0.0001       | **** | <b>-0.1518</b> | 0.037          | *    | <b>-0.1891</b>    | 0.0166         | *    | -0.02539         | 0.8254         | ns   | 0.2853         | 0.0869         | ns | -0.2254        | 0.1412         | ns  |
| CXCL1 /<br>204470_at     | <b>-0.2792</b>       | < 0.0001       | **** | -0.1142        | 0.1176         | ns   | <b>-0.2027</b>    | 0.0102         | *    | <b>-0.2296</b>   | 0.0431         | *    | -0.1756        | 0.2986         | ns | 0.02119        | 0.8914         | ns  |
| CXCL2 /<br>209774_x_at   | <b>-0.2313</b>       | < 0.0001       | **** | -0.1349        | 0.0641         | ns   | 0.01379           | 0.8626         | ns   | -0.06971         | 0.5442         | ns   | -0.09483       | 0.5766         | ns | 0.01896        | 0.9028         | ns  |
| CXCL6 /<br>206336_at     | <b>-0.1427</b>       | 0.0013         | **   | 0.03469        | 0.6355         | ns   | <b>-0.1704</b>    | 0.0312         | *    | <b>-0.319</b>    | 0.0044         | **   | <b>-0.3725</b> | 0.0232         | *  | -0.008293      | 0.9574         | ns  |
| ICAM1 /<br>202637_s_at   | <b>-0.429</b>        | < 0.0001       | **** | <b>-0.2909</b> | < 0.0001       | **** | <b>-0.2806</b>    | 0.0003         | ***  | -0.1219          | 0.2879         | ns   | -0.1899        | 0.2603         | ns | -0.1799        | 0.2425         | ns  |
| ICAM1 /<br>202638_s_at   | <b>-0.285</b>        | < 0.0001       | **** | <b>-0.2382</b> | 0.001          | ***  | 0.06277           | 0.4304         | ns   | 0.1146           | 0.3176         | ns   | -0.02906       | 0.8644         | ns | -0.02766       | 0.8585         | ns  |
| ICAM1 /<br>215485_s_at   | <b>-0.2894</b>       | < 0.0001       | **** | <b>-0.2085</b> | 0.004          | **   | <b>-0.198</b>     | 0.0121         | *    | -0.001536        | 0.9894         | ns   | -0.02489       | 0.8837         | ns | <b>-0.5034</b> | 0.0005         | *** |
| IKBKE /<br>204549_at     | <b>-0.3324</b>       | < 0.0001       | **** | -0.115         | 0.1151         | ns   | <b>-0.4609</b>    | < 0.0001       | **** | <b>-0.3982</b>   | 0.0003         | ***  | -0.1549        | 0.3599         | ns | <b>-0.2983</b> | 0.0492         | *   |
| IKBKE /<br>214398_s_at   | -0.09471             | 0.0328         | *    | -0.01735       | 0.8127         | ns   | <b>-0.2154</b>    | 0.0062         | **   | <b>-0.2245</b>   | 0.0482         | *    | -0.05331       | 0.754          | ns | -0.128         | 0.4078         | ns  |
| IL1A /<br>208200_at      | -0.06317             | 0.1551         | ns   | -0.114         | 0.1182         | ns   | <b>-0.1971</b>    | 0.0125         | *    | <b>-0.4369</b>   | < 0.0001       | **** | 0.07732        | 0.6492         | ns | 0.1574         | 0.3075         | ns  |
| IL1A /<br>210118_s_at    | <b>-0.1641</b>       | 0.0002         | ***  | -0.1095        | 0.1338         | ns   | <b>-0.2509</b>    | 0.0014         | **   | <b>-0.3479</b>   | 0.0018         | **   | -0.2675        | 0.1095         | ns | -0.2294        | 0.1341         | ns  |
| LCN2 /<br>212531_at      | <b>-0.326</b>        | < 0.0001       | **** | -0.06943       | 0.3424         | ns   | <b>-0.2996</b>    | 0.0001         | ***  | -0.02057         | 0.8581         | ns   | -0.1639        | 0.3323         | ns | 0.0961         | 0.5349         | ns  |
| TNFRSF9 /<br>207536_s_at | <b>-0.2588</b>       | < 0.0001       | **** | -0.08788       | 0.2292         | ns   | <b>-0.337</b>     | < 0.0001       | **** | <b>-0.2515</b>   | 0.0263         | *    | -0.2209        | 0.1889         | ns | -0.2201        | 0.1512         | ns  |

**Table S3 cont.**

Glück Breast (GSE22358)

| MYB / 16972   | all subtypes (n=152) |                |      | basal (n=45)   |                |      | luminal A (n=46) |                |      | luminal B (n=25) |                |      | HER2+ (n=21) |                |      | normal (n=15) |                |      |
|---------------|----------------------|----------------|------|----------------|----------------|------|------------------|----------------|------|------------------|----------------|------|--------------|----------------|------|---------------|----------------|------|
|               | r                    | p (two-tailed) |      | r              | p (two-tailed) |      | r                | p (two-tailed) |      | r                | p (two-tailed) |      | r            | p (two-tailed) |      | r             | p (two-tailed) |      |
| CCL2 / 31182  | <b>-0.4579</b>       | < 0.0001       | **** | <b>-0.3637</b> | 0.014          | *    | <b>-0.4158</b>   | 0.0041         | **   | <b>-0.6952</b>   | 0.0001         | ***  | -0.03541     | 0.8789         | ns   | 0.3317        | 0.2271         | ns   |
| CCL2 / 37637  | <b>-0.4963</b>       | < 0.0001       | **** | <b>-0.409</b>  | 0.0053         | **   | <b>-0.4377</b>   | 0.0024         | **   | <b>-0.7037</b>   | < 0.0001       | **** | -0.102       | 0.66           | ns   | 0.3955        | 0.1445         | ns   |
| CXCL1 / 2192  | <b>-0.3485</b>       | < 0.0001       | **** | -0.00939       | 0.9512         | ns   | <b>-0.444</b>    | 0.002          | **   | <b>-0.478</b>    | 0.0157         | *    | 0.1213       | 0.6004         | ns   | 0.2873        | 0.2992         | ns   |
| CXCL1 / 24518 | <b>-0.3403</b>       | < 0.0001       | **** | -0.0104        | 0.9459         | ns   | <b>-0.3266</b>   | 0.0267         | *    | <b>-0.4171</b>   | 0.038          | *    | 0.1192       | 0.6069         | ns   | 0.3382        | 0.2176         | ns   |
| CXCL1 / 35599 | <b>-0.3264</b>       | < 0.0001       | **** | -0.00253       | 0.9868         | ns   | <b>-0.4161</b>   | 0.004          | **   | <b>-0.5028</b>   | 0.0104         | *    | 0.06089      | 0.7932         | ns   | 0.195         | 0.4861         | ns   |
| CXCL16 / 6008 | <b>-0.3647</b>       | < 0.0001       | **** | -0.09895       | 0.5178         | ns   | <b>-0.3269</b>   | 0.0266         | *    | <b>-0.681</b>    | 0.0002         | ***  | -0.2068      | 0.3684         | ns   | 0.03536       | 0.9004         | ns   |
| CXCL2 / 22039 | <b>-0.2879</b>       | 0.0003         | ***  | 0.003119       | 0.9838         | ns   | -0.2142          | 0.1528         | ns   | <b>-0.4507</b>   | 0.0238         | *    | 0.1494       | 0.5181         | ns   | -0.1414       | 0.6152         | ns   |
| CXCL2 / 3722  | <b>-0.3919</b>       | < 0.0001       | **** | -0.1282        | 0.4014         | ns   | <b>-0.3427</b>   | 0.0197         | *    | <b>-0.4278</b>   | 0.0329         | *    | -0.1599      | 0.4886         | ns   | 0.239         | 0.391          | ns   |
| CXCL6 / 25085 | <b>-0.3128</b>       | < 0.0001       | **** | -0.1817        | 0.2323         | ns   | <b>-0.3783</b>   | 0.0095         | **   | <b>-0.5142</b>   | 0.0086         | **   | -0.07318     | 0.7526         | ns   | 0.1655        | 0.5555         | ns   |
| ICAM1 / 24842 | <b>-0.4825</b>       | < 0.0001       | **** | <b>-0.3899</b> | 0.0081         | **   | <b>-0.2935</b>   | 0.0477         | *    | -0.1175          | 0.5759         | ns   | -0.3743      | 0.0946         | ns   | -0.2191       | 0.4328         | ns   |
| ICAM1 / 27689 | <b>-0.5117</b>       | < 0.0001       | **** | <b>-0.5134</b> | 0.0003         | ***  | <b>-0.4324</b>   | 0.0027         | **   | -0.3162          | 0.1236         | ns   | -0.349       | 0.121          | ns   | 0.558         | 0.0307         | *    |
| ICAM1 / 7682  | <b>-0.4438</b>       | < 0.0001       | **** | <b>-0.4361</b> | 0.0027         | **   | -0.1514          | 0.3151         | ns   | -0.1034          | 0.623          | ns   | -0.3724      | 0.0964         | ns   | 0.2685        | 0.3333         | ns   |
| IKBKE / 18931 | 0.01187              | 0.8846         | ns   | -0.01317       | 0.9316         | ns   | 0.43             | 0.0029         | **   | -0.227           | 0.2752         | ns   | 0.1129       | 0.626          | ns   | 0.1783        | 0.5248         | ns   |
| IL1A / 13203  | <b>-0.1998</b>       | 0.0136         | *    | -0.1484        | 0.3306         | ns   | -0.14            | 0.3533         | ns   | -0.1381          | 0.5103         | ns   | -0.00203     | 0.993          | ns   | 0.05968       | 0.8327         | ns   |
| IL1A / 17011  | <b>-0.1784</b>       | 0.0279         | *    | -0.1743        | 0.2521         | ns   | -0.2701          | 0.0695         | ns   | -0.06358         | 0.7627         | ns   | 0.07516      | 0.7461         | ns   | -0.03447      | 0.9029         | ns   |
| IL1A / 42653  | -0.00251             | 0.9756         | ns   | -0.0927        | 0.5447         | ns   | 0.05321          | 0.7285         | ns   | -0.1022          | 0.6269         | ns   | -0.07469     | 0.7476         | ns   | -0.02304      | 0.935          | ns   |
| LCN2 / 33737  | <b>-0.1756</b>       | 0.0305         | *    | 0.06941        | 0.6505         | ns   | -0.1928          | 0.1992         | ns   | 0.1646           | 0.4318         | ns   | 0.1757       | 0.4461         | ns   | 0.1432        | 0.6107         | ns   |
| LCN2 / 7029   | <b>-0.1934</b>       | 0.017          | *    | 0.05617        | 0.714          | ns   | -0.06909         | 0.6482         | ns   | 0.2578           | 0.2135         | ns   | -0.04479     | 0.8471         | ns   | 0.2991        | 0.2788         | ns   |
| MYB / 24716   | 0.9938               | < 0.0001       | **** | 0.9942         | < 0.0001       | **** | 0.9905           | < 0.0001       | **** | 0.9882           | < 0.0001       | **** | 0.9883       | < 0.0001       | **** | 0.9789        | < 0.0001       | **** |
| MYB / 39141   | 0.974                | < 0.0001       | **** | 0.9758         | < 0.0001       | **** | 0.9748           | < 0.0001       | **** | 0.9432           | < 0.0001       | **** | 0.9087       | < 0.0001       | **** | 0.9549        | < 0.0001       | **** |
| TNFRSF9/4975  | <b>-0.2707</b>       | 0.0008         | ***  | -0.2342        | 0.1215         | ns   | <b>-0.3907</b>   | 0.0073         | **   | -0.1544          | 0.4612         | ns   | -0.2617      | 0.2519         | ns   | -0.3938       | 0.1636         | ns   |

**Table S3 cont.**

Esserman Breast (GSE22226)

| MYB /<br>A_23_P31073     | all subtypes (n=129) |                |      | basal (n=43) |                |    | luminal A (n=32) |                |    | luminal B (n=25) |                |    | HER2+ (n=21) |                |    | normal (n=8)   |                |    |
|--------------------------|----------------------|----------------|------|--------------|----------------|----|------------------|----------------|----|------------------|----------------|----|--------------|----------------|----|----------------|----------------|----|
|                          | r                    | p (two-tailed) |      | r            | p (two-tailed) |    | r                | p (two-tailed) |    | r                | p (two-tailed) |    | r            | p (two-tailed) |    | r              | p (two-tailed) |    |
| CCL2 /<br>A_23_P89431    | <b>-0.3138</b>       | 0.0003         | ***  | -0.1994      | 0.1998         | ns | -0.2046          | 0.2613         | ns | <b>-0.431</b>    | 0.0315         | *  | -0.335       | 0.1377         | ns | -0.04065       | 0.9239         | ns |
| CXCL1 /<br>A_23_P7144    | <b>-0.3081</b>       | 0.0004         | ***  | 0.04465      | 0.7762         | ns | 0.02848          | 0.8771         | ns | 0.0977           | 0.6422         | ns | -0.3862      | 0.0838         | ns | -0.2994        | 0.4712         | ns |
| CXCL16 /<br>A_23_P38505  | <b>-0.2381</b>       | 0.0068         | **   | -0.00799     | 0.96           | ns | 0.1228           | 0.503          | ns | 0.0447           | 0.832          | ns | -0.2658      | 0.2441         | ns | -0.0931        | 0.8264         | ns |
| CXCL6 /<br>A_23_P155755  | <b>-0.2032</b>       | 0.0209         | *    | -0.2682      | 0.0821         | ns | 0.1427           | 0.4358         | ns | -0.044           | 0.8357         | ns | -0.2103      | 0.3603         | ns | <b>-0.7098</b> | 0.0486         | *  |
| ICAM1 /<br>A_23_P153320  | <b>-0.3414</b>       | < 0.0001       | **** | -0.222       | 0.1524         | ns | 0.02051          | 0.9113         | ns | -0.203           | 0.3304         | ns | -0.4237      | 0.0556         | ns | -0.5211        | 0.1854         | ns |
| IKBKE /<br>A_23_P887     | -0.1476              | 0.0964         | ns   | -0.127       | 0.423          | ns | 0.1376           | 0.4526         | ns | -0.073           | 0.7275         | ns | -0.0206      | 0.9294         | ns | <b>-0.8633</b> | 0.0057         | ** |
| IL1A /<br>A_23_P72096    | -0.001919            | 0.9828         | ns   | -0.1041      | 0.5063         | ns | 0.137            | 0.4545         | ns | 0.1994           | 0.3392         | ns | 0.1805       | 0.4337         | ns | -0.2579        | 0.5375         | ns |
| LCN2 /<br>A_23_P169437   | <b>-0.3074</b>       | 0.0004         | ***  | -0.1643      | 0.2924         | ns | 0.2021           | 0.2673         | ns | -0.237           | 0.2549         | ns | 0.08325      | 0.7198         | ns | <b>-0.768</b>  | 0.026          | *  |
| TNFRSF9 /<br>A_23_P51936 | -0.03086             | 0.7285         | ns   | 0.1304       | 0.4045         | ns | -0.03132         | 0.8649         | ns | -0.312           | 0.1292         | ns | 0.2019       | 0.3802         | ns | 0.3258         | 0.431          | ns |

**Table S3 cont.**

Boss Breast (GSE12276)

| MYB / 204798_at       | all subtypes (n=204) |                |      |
|-----------------------|----------------------|----------------|------|
|                       | r                    | p (two-tailed) |      |
| CCL2 / 216598_s_at    | <b>-0.3441</b>       | < 0.0001       | **** |
| CXCL1 / 204470_at     | <b>-0.5058</b>       | < 0.0001       | **** |
| CXCL16 / 223454_at    | <b>-0.3616</b>       | < 0.0001       | **** |
| CXCL2 / 209774_x_at   | <b>-0.383</b>        | < 0.0001       | **** |
| CXCL2 / 230101_at     | 0.07933              | 0.2594         | ns   |
| CXCL6 / 206336_at     | <b>-0.252</b>        | 0.0003         | ***  |
| ICAM1 / 202637_s_at   | <b>-0.4202</b>       | < 0.0001       | **** |
| ICAM1 / 202638_s_at   | <b>-0.3988</b>       | < 0.0001       | **** |
| ICAM1 / 215485_s_at   | <b>-0.3747</b>       | < 0.0001       | **** |
| IKBKE / 204549_at     | -0.08999             | 0.2005         | ns   |
| IKBKE / 214398_s_at   | <b>-0.1528</b>       | 0.0291         | *    |
| IL1A / 208200_at      | 0.09163              | 0.1924         | ns   |
| IL1A / 210118_s_at    | -0.03529             | 0.6163         | ns   |
| LCN2 / 212531_at      | <b>-0.4217</b>       | < 0.0001       | **** |
| TNFRSF9 / 207536_s_at | <b>-0.1925</b>       | 0.0058         | **   |
| TNFRSF9 / 211786_at   | <b>-0.1272</b>       | 0.0698         | ns   |

**Table S3 cont.**

Kao Breast (GSE20685)

| MYB / 204798_at       | all (n=327)    |                |      | basal (n=43) |                |    | lum A (n=125)  |                |      |
|-----------------------|----------------|----------------|------|--------------|----------------|----|----------------|----------------|------|
|                       | r              | P (two-tailed) |      | r            | P (two-tailed) |    | r              | P (two-tailed) |      |
| CCL2 / 216598_s_at    | <b>-0.4116</b> | < 0.0001       | **** | 0.08341      | 0.5949         | ns | <b>-0.3871</b> | < 0.0001       | **** |
| CXCL1 / 204470_at     | <b>-0.3483</b> | < 0.0001       | **** | 0.1572       | 0.314          | ns | -0.07594       | 0.4            | ns   |
| CXCL16 / 223454_at    | <b>-0.4418</b> | < 0.0001       | **** | 0.01759      | 0.9109         | ns | <b>-0.2097</b> | 0.0189         | *    |
| CXCL2 / 209774_x_at   | <b>-0.2559</b> | < 0.0001       | **** | 0.1153       | 0.4615         | ns | -0.1004        | 0.2654         | ns   |
| CXCL2 / 230101_at     | -0.01981       | 0.7212         | ns   | -0.08689     | 0.5796         | ns | 0.06825        | 0.4495         | ns   |
| CXCL6 / 206336_at     | <b>-0.1687</b> | 0.0022         | **   | 0.2817       | 0.0672         | ns | -0.002832      | 0.975          | ns   |
| ICAM1 / 202637_s_at   | <b>-0.4574</b> | < 0.0001       | **** | -0.01102     | 0.9441         | ns | <b>-0.1863</b> | 0.0375         | *    |
| ICAM1 / 202638_s_at   | <b>-0.3294</b> | < 0.0001       | **** | 0.03342      | 0.8315         | ns | -0.08209       | 0.3627         | ns   |
| ICAM1 / 215485_s_at   | <b>-0.3456</b> | < 0.0001       | **** | -0.1026      | 0.5125         | ns | -0.08075       | 0.3707         | ns   |
| IKBKE / 204549_at     | <b>-0.2002</b> | 0.0003         | ***  | 0.07222      | 0.6453         | ns | 0.0128         | 0.8874         | ns   |
| IKBKE / 214398_s_at   | <b>-0.2003</b> | 0.0003         | ***  | 0.02959      | 0.8506         | ns | 0.04673        | 0.6048         | ns   |
| IL1A / 208200_at      | 0.05595        | 0.3131         | ns   | 0.1495       | 0.3386         | ns | 0.1212         | 0.1781         | ns   |
| IL1A / 210118_s_at    | -0.07649       | 0.1676         | ns   | -0.07031     | 0.6542         | ns | 0.06359        | 0.4811         | ns   |
| LCN2 / 212531_at      | <b>-0.3001</b> | < 0.0001       | **** | -0.07311     | 0.6413         | ns | 0.02289        | 0.8            | ns   |
| TNFRSF9 / 207536_s_at | <b>-0.3978</b> | < 0.0001       | **** | 0.08965      | 0.5675         | ns | <b>-0.2384</b> | 0.0074         | **   |
| TNFRSF9 / 211786_at   | <b>-0.1599</b> | 0.0037         | **   | 0.06945      | 0.6581         | ns | -0.03279       | 0.7166         | ns   |

**Table S4**

| <b>Category</b> | <b>Term</b>                           | <b>Count</b> | <b>%</b> | <b>PValue</b> | <b>Fold Enrichment</b> | <b>Bonferroni</b> | <b>Benjamini</b> |
|-----------------|---------------------------------------|--------------|----------|---------------|------------------------|-------------------|------------------|
| GOTERM_BP_FAT   | GO:0006955~immune response            | 12           | 34.285   | 9.738038E-10  | 11.937                 | 5.268277E-7       | 5.268277E-7      |
| GOTERM_MF_FAT   | GO:0005125~cytokine activity          | 8            | 22.8571  | 1.520365E-08  | 24.607                 | 1.50516E-6        | 1.50516E-6       |
| GOTERM_MF_FAT   | GO:0008009~chemokine activity         | 5            | 14.285   | 4.84164E-07   | 72.85                  | 4.79311E-5        | 2.396584E-5      |
| GOTERM_MF_FAT   | GO:0042379~chemokine receptor binding | 5            | 14.285   | 5.388794E-07  | 70.982                 | 5.334765E-5       | 1.778287E-5      |
| GOTERM_BP_FAT   | GO:0006954~inflammatory response      | 7            | 20.0     | 5.356089E-06  | 14.577                 | 0.002893          | 0.001448         |
| GOTERM_CC_FAT   | GO:0005615~extracellular space        | 8            | 22.857   | 0.000025      | 8.156                  | 0.00129           | 0.00129          |
| GOTERM_CC_FAT   | GO:0044421~extracellular region part  | 9            | 25.7142  | 0.000044      | 6.058                  | 0.002255          | 0.001128         |

GO terms enriched for 35 genes highly expressed in lung3 and suppressed in MYBup cells (fold change>1.5, p<0.01). GO enrichment (FDR < 0.05) for biological processes (BP), molecular function (MF) and cellular compartment (CC) was performed using DAVID. Table shows category, GO term, number of genes (count), %, *P* values for EASE score, fold enrichment, Bonferroni and Benjamini adjustment.

**Table S5:** GO enrichment analysis

| <b>Biological process</b>                                   | <b>GO ID</b> | <b># reference genes in the category</b> | <b># genes in the gene set and also in the category</b> | <b>expected # in the category</b> | <b>ratio of enrichment</b> | <b>p value from hypergeometric test</b> | <b>p value adjusted by the multiple test adjustment</b> |
|-------------------------------------------------------------|--------------|------------------------------------------|---------------------------------------------------------|-----------------------------------|----------------------------|-----------------------------------------|---------------------------------------------------------|
| immune response                                             | GO:0006955   | C=680                                    | O=13                                                    | E=0.97                            | R=13.42                    | rawP=3.91e-12                           | adjP=2.17e-09                                           |
| immune system process                                       | GO:0002376   | C=1353                                   | O=15                                                    | E=1.93                            | R=7.78                     | rawP=1.25e-10                           | adjP=3.47e-08                                           |
| positive regulation of transport                            | GO:0051050   | C=524                                    | O=8                                                     | E=0.75                            | R=10.71                    | rawP=5.64e-07                           | adjP=0.0001                                             |
| inflammatory response                                       | GO:0006954   | C=388                                    | O=7                                                     | E=0.55                            | R=12.66                    | rawP=1.05e-06                           | adjP=0.0001                                             |
| leukocyte migration                                         | GO:0050900   | C=165                                    | O=5                                                     | E=0.24                            | R=21.26                    | rawP=3.52e-06                           | adjP=0.0002                                             |
| defense response                                            | GO:0006952   | C=812                                    | O=9                                                     | E=1.16                            | R=7.78                     | rawP=1.43e-06                           | adjP=0.0002                                             |
| regulation of vascular endothelial growth factor production | GO:0010574   | C=20                                     | O=3                                                     | E=0.03                            | R=105.26                   | rawP=2.96e-06                           | adjP=0.0002                                             |
| vascular endothelial growth factor production               | GO:0010573   | C=20                                     | O=3                                                     | E=0.03                            | R=105.26                   | rawP=2.96e-06                           | adjP=0.0002                                             |
| innate immune response                                      | GO:0045087   | C=299                                    | O=6                                                     | E=0.43                            | R=14.08                    | rawP=3.69e-06                           | adjP=0.0002                                             |
| positive regulation of multicellular organismal process     | GO:0051240   | C=520                                    | O=7                                                     | E=0.74                            | R=9.45                     | rawP=7.24e-06                           | adjP=0.0003                                             |

| <b>Molecular function</b>          | <b>GO ID</b> | <b># reference genes in the category</b> | <b># genes in the gene set and also in the category</b> | <b>expected # in the category</b> | <b>ratio of enrichment</b> | <b>p value from hypergeometric test</b> | <b>p value adjusted by the multiple test adjustment</b> |
|------------------------------------|--------------|------------------------------------------|---------------------------------------------------------|-----------------------------------|----------------------------|-----------------------------------------|---------------------------------------------------------|
| cytokine activity                  | GO:0005125   | C=186                                    | O=7                                                     | E=0.25                            | R=27.49                    | rawP=5.14e-09                           | adjP=3.60e-07                                           |
| chemokine activity                 | GO:0008009   | C=35                                     | O=4                                                     | E=0.05                            | R=83.47                    | rawP=1.47e-07                           | adjP=5.15e-06                                           |
| cytokine receptor binding          | GO:0005126   | C=200                                    | O=6                                                     | E=0.27                            | R=21.91                    | rawP=2.74e-07                           | adjP=6.39e-06                                           |
| chemokine receptor binding         | GO:0042379   | C=45                                     | O=4                                                     | E=0.06                            | R=64.92                    | rawP=4.14e-07                           | adjP=7.25e-06                                           |
| receptor binding                   | GO:0005102   | C=1173                                   | O=10                                                    | E=1.61                            | R=6.23                     | rawP=2.29e-06                           | adjP=3.21e-05                                           |
| G-protein coupled receptor binding | GO:0001664   | C=185                                    | O=5                                                     | E=0.25                            | R=19.74                    | rawP=4.98e-06                           | adjP=5.81e-05                                           |
| copper ion binding                 | GO:0005507   | C=51                                     | O=3                                                     | E=0.07                            | R=42.96                    | rawP=4.64e-05                           | adjP=0.0005                                             |
| growth factor activity             | GO:0008083   | C=144                                    | O=3                                                     | E=0.20                            | R=15.22                    | rawP=0.0010                             | adjP=0.0088                                             |
| protein binding                    | GO:0005515   | C=6206                                   | O=17                                                    | E=8.50                            | R=2.00                     | rawP=0.0012                             | adjP=0.0093                                             |
| binding                            | GO:0005488   | C=10881                                  | O=23                                                    | E=14.90                           | R=1.54                     | rawP=0.0033                             | adjP=0.0231                                             |

| <b>Cellular component</b>       | <b>GO ID</b> | <b># reference genes in the category</b> | <b># genes in the gene set and also in the category</b> | <b>expected # in the category</b> | <b>ratio of enrichment</b> | <b>p value from hypergeometric test</b> | <b>p value adjusted by the multiple test adjustment</b> |
|---------------------------------|--------------|------------------------------------------|---------------------------------------------------------|-----------------------------------|----------------------------|-----------------------------------------|---------------------------------------------------------|
| extracellular space             | GO:0005615   | C=790                                    | O=11                                                    | E=1.13                            | R=9.74                     | rawP=7.21e-09                           | adjP=3.24e-07                                           |
| extracellular region part       | GO:0044421   | C=1046                                   | O=11                                                    | E=1.50                            | R=7.36                     | rawP=1.27e-07                           | adjP=2.86e-06                                           |
| extracellular region            | GO:0005576   | C=1831                                   | O=12                                                    | E=2.62                            | R=4.58                     | rawP=4.62e-06                           | adjP=6.93e-05                                           |
| cell surface                    | GO:0009986   | C=563                                    | O=7                                                     | E=0.80                            | R=8.70                     | rawP=1.24e-05                           | adjP=0.0001                                             |
| plasma membrane                 | GO:0005886   | C=3615                                   | O=13                                                    | E=5.17                            | R=2.52                     | rawP=0.0009                             | adjP=0.0081                                             |
| cell periphery                  | GO:0071944   | C=3707                                   | O=13                                                    | E=5.30                            | R=2.45                     | rawP=0.0011                             | adjP=0.0083                                             |
| anchored to membrane            | GO:0031225   | C=136                                    | O=2                                                     | E=0.19                            | R=10.29                    | rawP=0.0162                             | adjP=0.0885                                             |
| plasma membrane part            | GO:0044459   | C=1440                                   | O=6                                                     | E=2.06                            | R=2.91                     | rawP=0.0152                             | adjP=0.0885                                             |
| perinuclear region of cytoplasm | GO:0048471   | C=388                                    | O=3                                                     | E=0.55                            | R=5.41                     | rawP=0.0177                             | adjP=0.0885                                             |
| apical plasma membrane          | GO:0016324   | C=215                                    | O=2                                                     | E=0.31                            | R=6.51                     | rawP=0.0378                             | adjP=0.1583                                             |

GO terms enriched for 35 genes highly expressed in lung3 and suppressed in MYBup cells (fold change>1.5, p<0.01). GO enrichment analysis was performed using WebGestalt (WEB-based GENE SeT AnaLysis Toolkit). Table shows significantly enriched GO categories under Biological Process, Molecular Function, and Cellular Component. GO categories in the top 10 that also have a p value < 0.05 are shown. The table shows GO category, ID, the number of reference genes in the category (C), number of genes in the gene set and also in the category (O), expected number in the category (E), ratio of enrichment (R), p value from hypergeometric test (rawP), and p value adjusted by multiple test adjustment (Benjamini & Hochberg).



## Supplementary methods

### Plasmids and transfection

To generate expression plasmid pCMV.mCcl2 murine *Ccl2* was PCR amplified using primers listed in Table S1 from cDNA obtained by reverse transcription of mouse splenic mRNA. The amplicon (450 bp) was inserted into the p3xFLAG-CMV-14 vector backbone using *EcoRI* and *XbaI*. For generation of pcDNA3.Myc-tag-Myb plasmid, murine *Myb* was first re-amplified without stop codon from pcDNA3.mMyb (3) using primers in Table S1, inserted in pcDNA3.1(+) using *HindIII/BamHI* and Myc-tag sequence with *BamHI/XhoI* cohesive overhangs was subsequently inserted in frame at the 3' end of *Myb* cDNA. Stable clone expressing Myc-tagged Myb (C11) was generated by transfection with pcDNA3.Myc-tag-Myb using Lipofecamine® LTX (Life Technologies) and selection with G418 (400 µg/ml).

### Cell cycle

Cells were washed with PBS and fixed in ice-cold 70% ethanol for 30 min at 4°C. Cells were centrifuged 200g/5min/4°C and stained with Vindel's solution (1 mM TrisCl, pH 8.0, 1 mM NaCl, 0.1% Triton X100, 10 mg/ml RNase, 50 mg/ml propidium iodide) and incubated for 30 min at 37°C. The DNA content was measured by the BD FACSVerser cytometer and data were analyzed with BD FACSuite software.

### Proliferation

Cells were plated at the density  $2 \times 10^4$ /ml and number of viable cells was determined by CASY cell counter (Roche) at the 24 hour interval for four days.

### Cytotoxicity

Cells were treated with 2.5 and 5 µM cisplatin (cis-diamminedichloroplatinum(II), CDDP) (Sigma, St. Louis, MO) and 100 and 500 µg/ml 5-fluorouracil (2,4-Dihydroxy-5-fluoropyrimidine, 5-FU) (Sigma, St. Louis, MO) for 48 hours. Cell viability was estimated with the crystal violet staining. The adherent cells were washed with PBS, fixed with ice-cold methanol and stained with 0.4 % crystal violet for 20 min. Upon washing and air-drying, the dye was extracted with 10% acetic acid and absorbance at 570 nm was determined by the microplate reader (Synergy HT, BioTek, USA).

### 4T1-luc cells with overexpressed *Myb* gene

Puromycin-resistant luciferase expressing 4T1-12B cells (4) were transfected with pcDNA3.mMyb using Lipofectamine LTX (Life Technologies) and selected with 500 µg/ml of G418. Single clones were generated and *Myb* overexpression was verified by qPCR.

### Intravital imaging

Mice injected with 4T1-luc cells were imaged using IVIS. Luciferin (1mg) was injected 10 min prior to imaging. Mice were under 2% Isofluran anesthesia, in a dorsal position placed in IVIS, and images taken.

### Immunohistochemistry

The study group included 68 BC patients, 35 node-negative and 33 node-positive cases. According to the TNM staging 22 patients are of stage I (T1 N0 M0 = 22), 19 patients of stage II (T1 N1 M0 = 6; T2 N0 M0 = 10; T3 N0 M0 = 3), 25 patients of stage III (T2 N1 M0 = 10; T1 N2 M0 = 3; T2 N2 M0 = 6; T2 N3 M0 = 2; T4 N1 M0 = 2; T3 N1 M0 = 1; T3 N2 M0 = 1), and 2 patients of stage IV (T1-2 N1 M1 = 2). Four µm thick tissue sections were

applied to positively charged slides, deparaffinized in xylene and rehydrated through a graded alcohol series. Endogenous peroxidase activity was quenched in 3% H<sub>2</sub>O<sub>2</sub> for 5 minutes. The antigen retrieval was performed by heating the sections in citrate buffer (pH 6.0) in microwave (for 6 min at 120 W). UltraVision LP Large Volume Detection System HRP Polymer (Ready-To-Use) kit (Thermo Fisher Scientific, UK) was used according to the manufacturer's instructions. 3,3'-diaminobenzidine (DAKO, Denmark) was used as chromogen. Slides were counterstained with Mayer's hematoxylin. Negative controls were prepared by incubating samples in the absence of primary antibody. Evaluation of all IHC results was performed using a uniform microscope and camera setting (Zeiss microscope). The tumors were evaluated for percentage of immunostained positive cells in 10 random fields at magnification ×200.

### **References:**

1. Gyorffy B, Lanczky A, Eklund AC, Denkert C, Budczies J, Li Q, et al. An online survival analysis tool to rapidly assess the effect of 22,277 genes on breast cancer prognosis using microarray data of 1,809 patients. *Breast Cancer Res Treat.* 2010;123:725-31.
2. Nicolau M, Levine AJ, Carlsson G. Topology based data analysis identifies a subgroup of breast cancers with a unique mutational profile and excellent survival. *Proc Natl Acad Sci U S A.* 2011;108:7265-70.
3. Knopfova L, Benes P, Pekarcikova L, Hermanova M, Masarik M, Pernicova Z, et al. c-Myb regulates matrix metalloproteinases 1/9, and cathepsin D: implications for matrix-dependent breast cancer cell invasion and metastasis. *Mol Cancer.* 2012;11:15.
4. Tao K, Fang M, Alroy J, Sahagian GG. Imagable 4T1 model for the study of late stage breast cancer. *BMC Cancer.* 2008;8:228.
